# Supplementary figures and images for: Profiling substrate specificity of two series of phenethylamine analogs at monoamine oxidase A and B
Source: Royal Society of Chemistry journal article supplement (doi:10.1039/c4ob01377h), 2014-09-25

N-Ethyl-2-phenethylamine (3) in D<sub>2</sub>O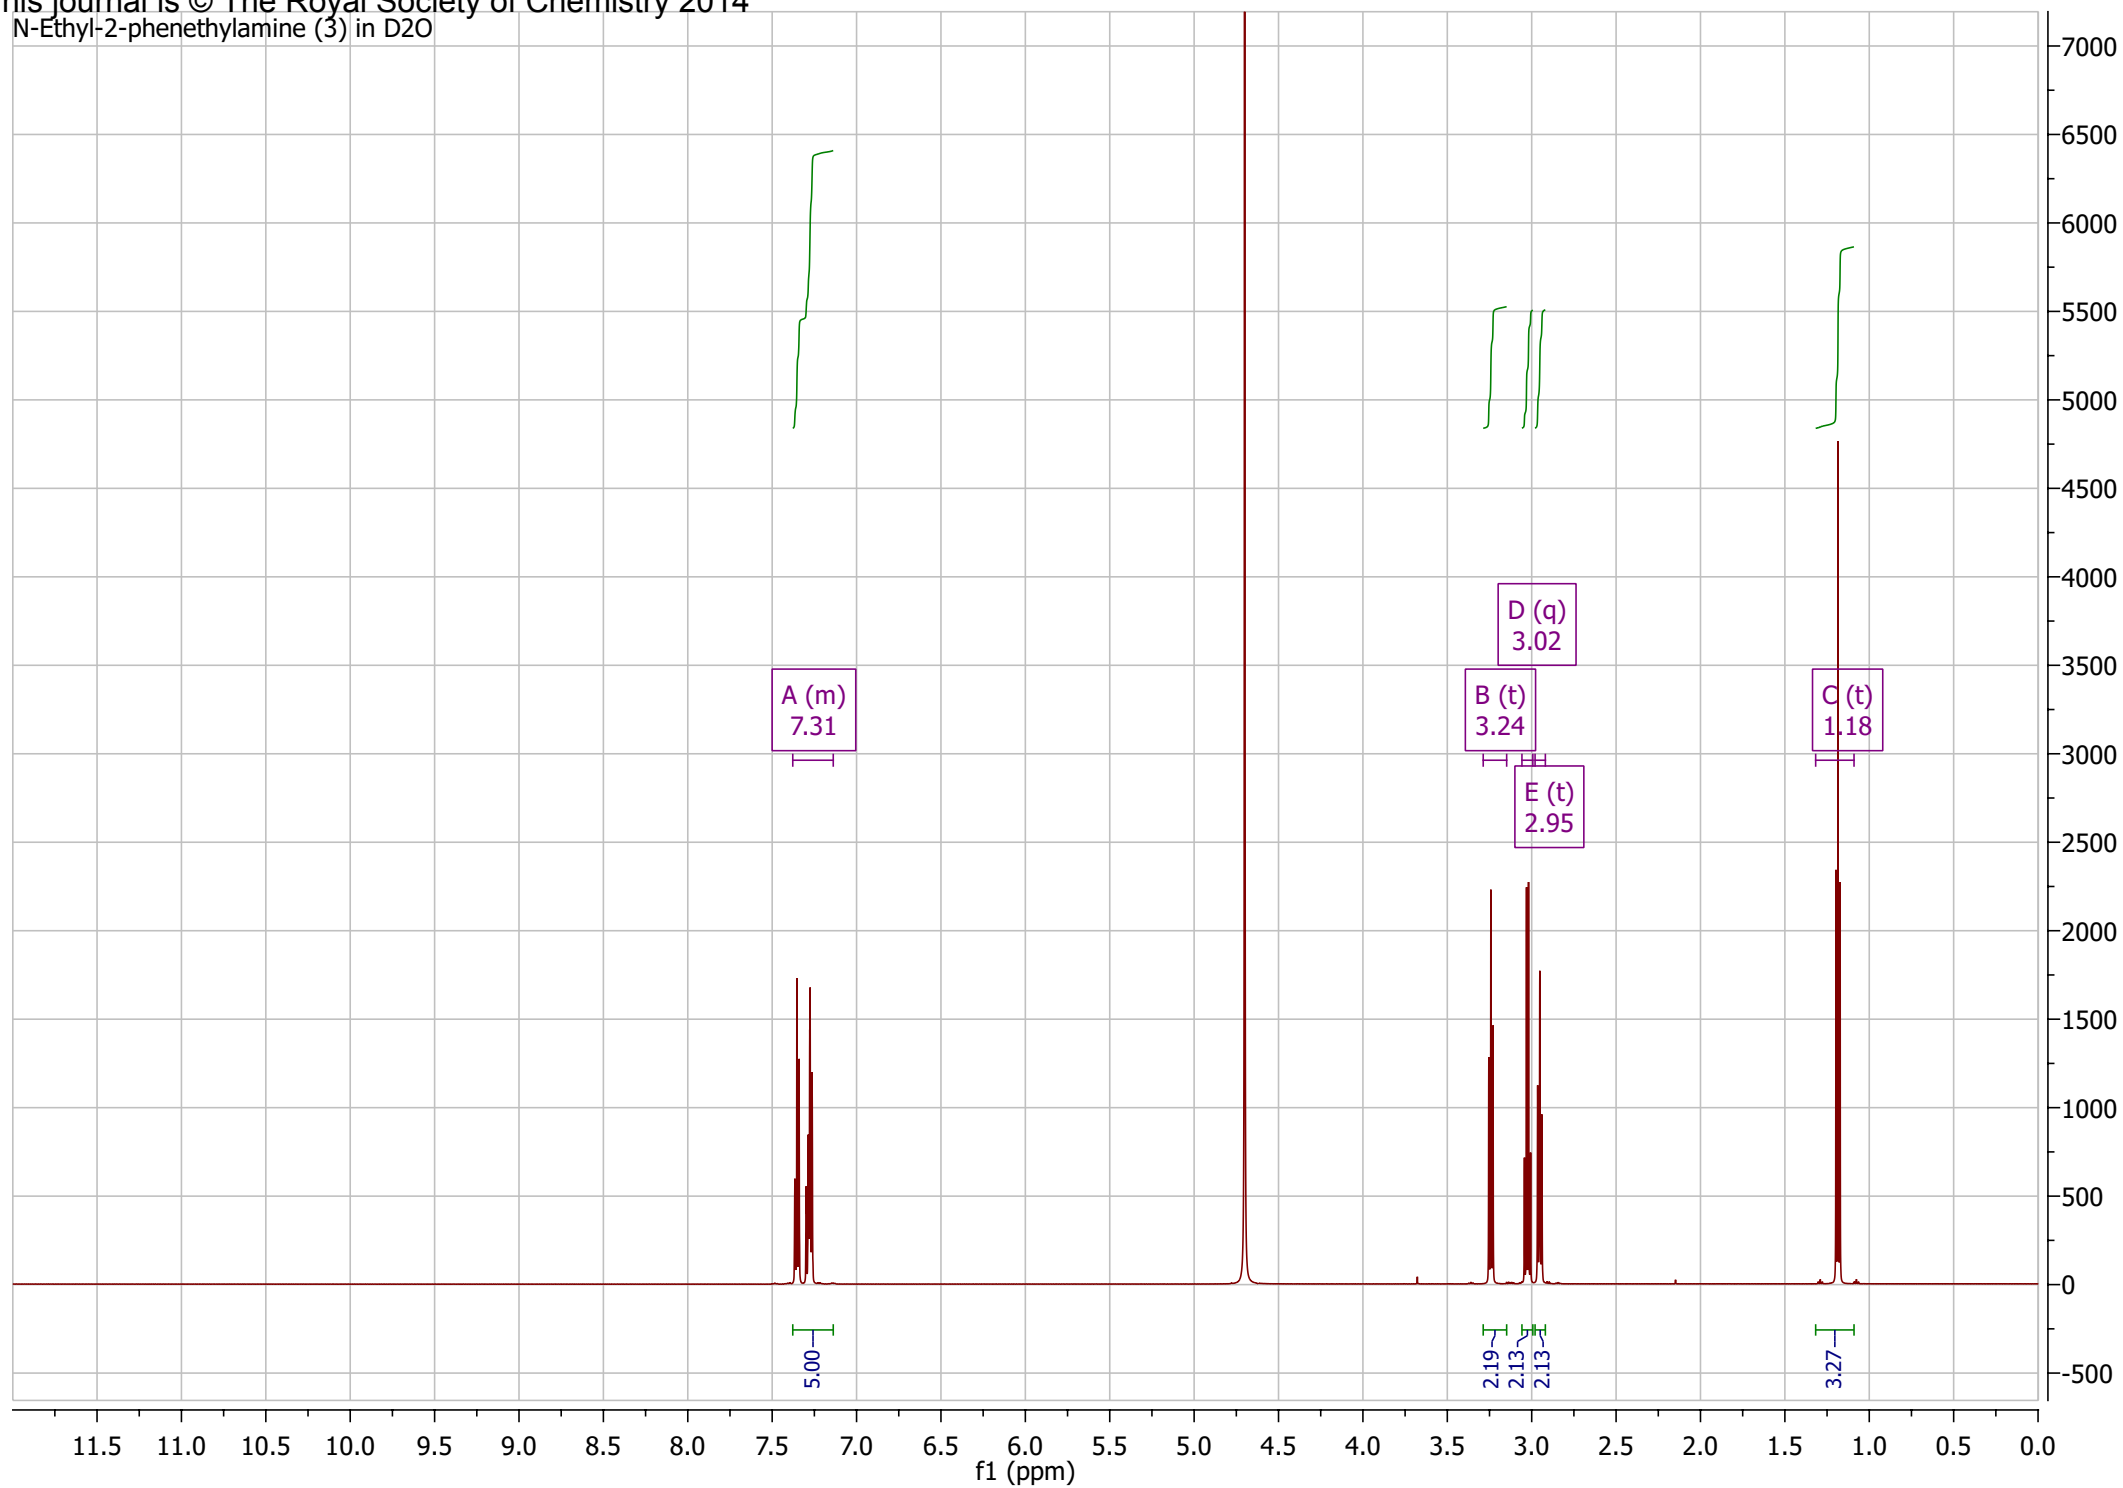

N-Propyl-2-phenethylamine (4) in CDCl<sub>3</sub>

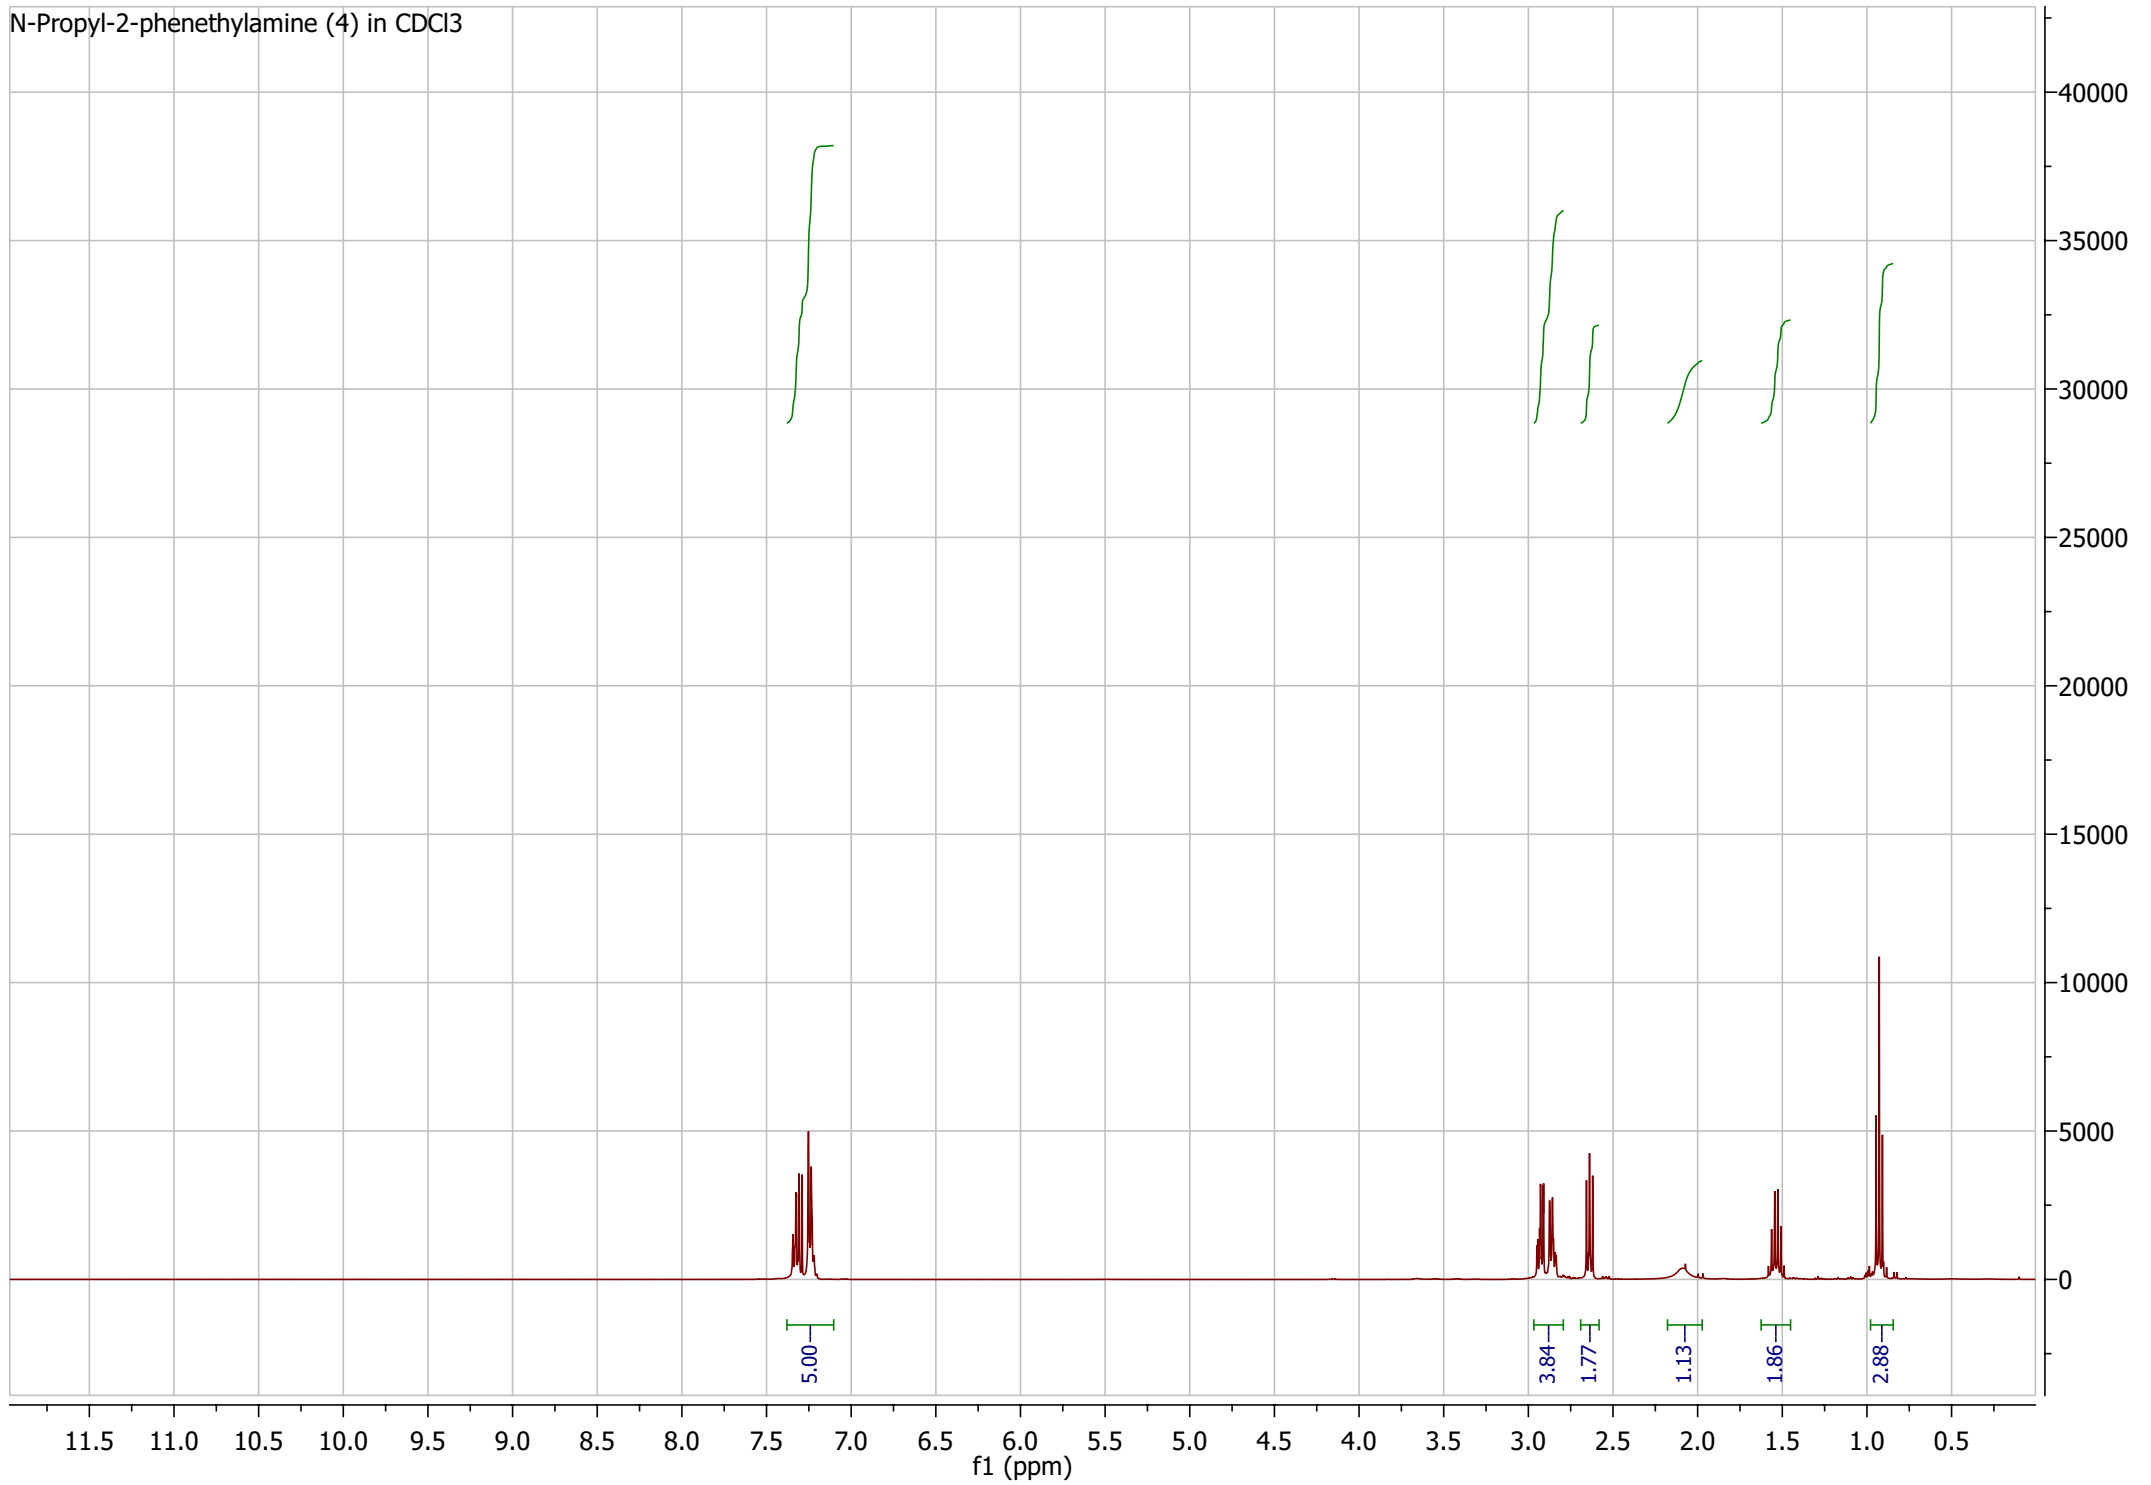

Supplement: c4ob01377h1.pdf [file c4ob01377h1.pdf]
